# Comprehensive Genomic Characterization of Breast Tumors with BRCA1 and BRCA2 Mutations

Avantika Lal<sup>1,\*</sup>, Daniele Ramazzotti<sup>1,2,\*</sup>, Ziming Weng<sup>1</sup>, Keli Liu<sup>3</sup>, James M. Ford<sup>4,5</sup>, and Arend Sidow<sup>1,5,#</sup>

<sup>1</sup>Department of Pathology, Stanford University; <sup>2</sup>Department of Computer Science, Stanford University;

<sup>3</sup>Department of Statistics, Stanford University; <sup>4</sup>Department of Medicine, Stanford University;

<sup>5</sup>Department of Genetics, Stanford University.

\*The first two authors should be regarded as joint first authors.

#Corresponding author.

Email addresses:

Avantika Lal: [avlal@stanford.edu](mailto:avlal@stanford.edu)

Daniele Ramazzotti: [daniele.ramazzotti@stanford.edu](mailto:daniele.ramazzotti@stanford.edu)

Ziming Weng: [zweng@stanford.edu](mailto:zweng@stanford.edu)

Keli Liu: [keliliu@stanford.edu](mailto:keliliu@stanford.edu)

James M. Ford: [jmf@stanford.edu](mailto:jmf@stanford.edu)

Arend Sidow: [arend@stanford.edu](mailto:arend@stanford.edu)

## **Abstract**

### **Background**

Germline mutations in the BRCA1 and BRCA2 genes predispose carriers to breast and ovarian cancer, and there remains a need to identify the specific genomic mechanisms by which cancer evolves in these patients. Here we present a systematic genomic analysis of breast tumors with BRCA1 and BRCA2 mutations, comparing these to common types of sporadic breast tumors.

### **Results**

We identify differences between BRCA-mutated and sporadic breast tumors in patterns of point mutation, DNA methylation and structural variation. We show that structural variation disproportionately affects tumor suppressor genes and identify specific driver gene candidates that are enriched for structural variation.

### **Conclusions**

Compared to sporadic tumors, BRCA-mutated breast tumors show signals of reduced DNA methylation, more ancestral cell divisions, and elevated rates of structural variation that tend to disrupt highly expressed protein-coding genes and known tumor suppressors. Our analysis suggests that BRCA-mutated tumors are more aggressive than sporadic breast cancers because loss of the BRCA pathway causes multiple processes of mutagenesis and gene dysregulation.

## Background

Breast cancer is the most commonly diagnosed cancer and the second leading cause of cancer death among women. Approximately 10-15% of cases are associated with familial DNA repair-deficiency disorder, among which the most common forms are related to germline variants in BRCA1 and BRCA2, two genes involved in homologous recombination repair<sup>1,2,3</sup>. A germline mutation in BRCA1 or BRCA2 genes is known to be associated with a much higher than average lifetime risk (72% for BRCA1 and 69% for BRCA2 mutation carriers<sup>4</sup>) of developing breast cancer. In addition, these carriers also have a high risk of ovarian and other cancers<sup>5,6</sup>.

The reason for this is not entirely clear. It is hypothesized that due to malfunctioning homologous repair machinery, tumors with BRCA1/2 mutations have a higher rate of incorrectly repaired double-strand DNA breaks<sup>7</sup>, leading to higher rates of structural variation in the genome, which may impact cell death or cell growth genes. In other words, an impaired BRCA complex could be a mutagen, analogous to environmental mutagens such as benzo(a)pyrene in tobacco smoke. But these tumors also show a propensity to dedifferentiate into a more primitive state<sup>7</sup>, which could result in a higher rate of cell division, increasing the chance that mutations, which occur as a function of DNA replication, may hit genes involved in cell death or growth<sup>8</sup>. Under this hypothesis, lack of BRCA function is not a distinctive mutagen but an amplifier of normal mutational mechanisms<sup>9</sup>. Either of these phenotypes alone could explain the increased risk of cancer in BRCA mutation carriers but it is also possible for the two phenotypes to act synergistically. However, despite increasing literature on the topic, there has been no resolution, and the mechanisms underlying breast cancers in patients with BRCA mutations are still not fully comprehended.

Tumors with BRCA gene mutations often display a basal phenotype and are triple-negative (lacking ER, PR and HER2 amplifications)<sup>10</sup>. Previous studies have identified differences in point

mutational signatures<sup>11</sup>, copy number profile<sup>12</sup>, gene expression signatures<sup>13</sup> and patterns of structural variation<sup>11</sup> between BRCA-mutated and sporadic breast tumors, indicating that tumor evolution follows a distinct path in these cancers. Moreover, in addition to patients with inherited germline mutations in the BRCA genes, somatic inactivation of BRCA1 and BRCA2 has also been reported in breast and ovarian tumors<sup>14,15</sup>. Recent studies suggest that such tumors may present similar phenotypes to those with germline BRCA inactivation<sup>16</sup>.

In this work we combine newly generated sequencing data with previous datasets, and perform an in-depth integrative analysis of genomic and epigenomic data in order to achieve better insights into the mechanism underlying tumor formation in individuals with BRCA gene mutations. Our aim here is to characterize the genomic variation in BRCA-mutated tumors and understand whether and how they are different from common classes of sporadic breast tumors. We present novel results on the differences in point mutation, DNA methylation, and structural variation in BRCA1/2 mutated tumors, and identify specific genes including known tumor suppressors that are frequently damaged by structural variation in these tumors.

## Results

**BRCA1/2-mutated tumors have a high burden of point mutations.** To compare the point mutation profiles of BRCA-mutated tumors with other breast tumors, we analyzed a published dataset of 560 breast tumors<sup>11</sup>. It includes 36 tumors with inactivating germline or somatic mutations in BRCA1 and 39 with inactivating germline or somatic mutations in BRCA2, as well as 118 triple-negative tumors, 293 ER+ (HER2-) tumors and 71 HER2+ tumors. Both BRCA1-mutated and BRCA2-mutated tumors present a significantly higher number of point mutations than the other classes (Figure 1), with BRCA1-mutated

tumors having a particularly high number of point mutations. Tumors with somatic BRCA1/2 mutations present similarly high mutation counts to those with germline inactivation.

### **Differences in mutational signature exposures between BRCA1/2-mutated and sporadic tumors.**

Mutational signatures are patterns of point mutations in the genome created by specific mutagenic processes, e.g., a chemical mutagen or a defect in a DNA repair enzyme<sup>17</sup>. If BRCA1/2-mutated tumors evolve via distinct point mutation-causing processes, they may possess unusual mutational signatures. We therefore analyzed whether the BRCA1/2-mutated tumors have a different pattern of mutational signatures from the remaining breast tumors.

A previous study<sup>11</sup> applied a widely used approach<sup>17</sup> for extracting mutational signatures from genomic data to the dataset of 560 breast tumors, resulting in 12 mutational signatures. Notably, the resulting signatures are very dense, and many are also very similar to each other. While some have been linked to known mutational processes in breast cancers, others still have no known etiology<sup>19</sup>. This may be due to the fact that this framework extracts as many signatures as required to improve the fit to the data, without testing whether these signatures perform well at fitting unseen data. This can be expected to result in a high number of signatures that potentially overfit the data. For these reasons, we wished to use a more principled approach that incorporates biological knowledge, as well as statistical methods to prevent overfitting.

We recently developed SparseSignatures<sup>20</sup>, a novel framework to identify mutational signatures. This method incorporates a background model representing the pattern of mutations caused in the normal course of cell division by DNA replication errors - a signature that we assume is present in all tumors. The background signature is fixed and additional signatures are discovered while incorporating a LASSO constraint to ensure that the signatures are sparse, producing a more biologically accurate and interpretable solution. SparseSignatures also applies a repeated bi-cross-validation strategy<sup>20</sup> to select the

number of signatures. This allows us to avoid overfitting by selecting a number of signatures that not only fit the data used to discover them but are also capable of predicting unseen data points.

We applied this approach to 555 breast tumors (we removed 5 tumors with <1000 mutations as previously described<sup>20</sup>). We discovered 8 mutational signatures in addition to the background (Figure 2a, Supplementary Table 1). These signatures are statistically strongly supported and most of them are related to known mutagenic mechanisms. Signatures 1 and 2 are associated with defective DNA mismatch repair<sup>21</sup>. Signature 3 is a pattern of elevated TT>GT point mutations, highest in a CTT context. Signature 4 is similar to the previously described<sup>11</sup> ‘Signature 18’, which has recently been associated with DNA damage caused by reactive oxygen species<sup>18</sup>. Signatures 5 and 7 are associated with deregulation of APOBEC cytidine deaminases<sup>19</sup>. Signature 6 is caused by deamination of methylated cytosines at CpG sites into thymine. Finally, Signature 8 is a relatively dense pattern characterized by an elevated rate of C>A, C>G and T>A mutations.

It is notable that despite finding fewer signatures, our solution still provides a better fit to the data (MSE = 364.345) than the previous solution<sup>11</sup> with 12 signatures (MSE = 1118.703). Along with providing a better fit to the data, our discovered signatures are sparser, more clearly differentiated from each other, and lack background noise (Supplementary Table 2).

We do not find two signatures described in the previous study - the highly dense, flat ‘Signature 3’ and ‘Signature 8’. While our Signature 8 bears some similarities to the previous ‘Signature 3’, it is considerably sparser and shows stronger nucleotide preferences, which may be due to our explicit separation of the background signature, thus preventing its being confounded with other signatures. We also do not find a signature similar to the previous ‘Signature 30’.

Compared to sporadic tumors, a higher fraction of mutations is attributed to Signature 8 in both BRCA1 and BRCA2-mutated tumors. While the etiology of this signature is uncertain, it is not simply

indicative of BRCA mutation as many sporadic triple-negative tumors also have a similarly high contribution by signature 8. In general, the mutational signature profiles of sporadic triple-negative tumors are very close to those of BRCA1/2-mutated tumors, indicating similar underlying mutagenic processes.

**BRCA tumors have lower levels of CpG methylation.** SparseSignatures also calculates the exposure values for each signature, i.e. the number of mutations originating from each signature in each patient (Supplementary Table 3). On average, the background signature (representing DNA replication errors) contributes more mutations than any other signature. The higher number of point mutations in the BRCA-mutated tumors, compared to sporadic tumors, is reflected in a higher exposure to the background signature, suggesting that these tumors have gone through more cell divisions (Figure 2b); in addition, the BRCA-mutated tumors also show higher exposure to all the discovered signatures except for signature 6, which is underrepresented in BRCA-mutated tumors (Figure 2c). This signature is caused by DNA CpG methylation and subsequent deamination of methylated cytosine to thymine leading to C>T mutation. The ratio of Signature 6 exposure to background signature exposure is significantly lower in both BRCA1 and BRCA2 mutated tumors compared to sporadic tumors ( $p = 2 \times 10^{-21}$  and  $1 \times 10^{-9}$  respectively; Supplementary Figure 1). Taking the background signature exposure as an indicator of cell division, this suggests that BRCA1/2-mutated tumors may have lower CpG methylation.

As DNA methylation data is not available for this dataset, we tested whether DNA methylation is lower in BRCA1/2-mutated tumors in a cohort of 682 breast cancers and 82 normal breast tissue samples from The Cancer Genome Atlas<sup>22</sup>. This dataset included 20 tumors with inactivating germline or somatic mutations in BRCA1 and 13 with inactivating germline or somatic mutations in BRCA2. We found that global CpG methylation levels are indeed significantly reduced in BRCA1-mutated tumors compared to all classes of sporadic tumors as well as normal tissue samples in the same dataset (Figure 2d;  $p(\text{BRCA1-mutated vs. sporadic}) = 3 \times 10^{-4}$ ;  $p(\text{BRCA1-mutated vs. normal tissue}) = 3 \times 10^{-5}$ ). On the other

hand, there was no significant difference between BRCA1-mutated and sporadic tumors in the methylation level of the 3081 CpA sites measured on the same platform (Supplementary Figure 2). We did not observe a significant difference in methylation levels between BRCA2-mutated and sporadic tumors. However, we note the low number of samples in this analysis.

### **BRCA1-mutated tumors have elevated tandem duplications and interchromosomal translocations.**

We obtained whole-genome sequencing data for 67 of the 560 tumor samples<sup>11</sup> along with their matched normal samples, for which BAM files were available for download from ICGC. In addition, we sequenced whole genomes from 14 additional tumors and matched normal samples<sup>23</sup> from patients carrying germline BRCA1/2 mutations, resulting in a dataset of 81 tumor genomes: 27 with germline BRCA1 mutations, 19 with BRCA2 mutations (17 germline and 2 somatic), and 35 sporadic breast tumors without BRCA inactivation, of which 19 were triple-negative and 16 were ER+. Supplementary Table 4 describes the selected samples.

We used SvABA<sup>24</sup> to identify somatic indels and structural variants in these tumor genomes. SvABA is a newly developed indel and structural variant caller that uses genome-wide local assembly to obtain superior sensitivity and specificity to previous methods. After filtering the variant calls (see Methods), we identified a total of 7,234 high-confidence somatic indels and 19,684 high-confidence somatic structural variants in the 81 tumor genomes. We then compared BRCA1/2-mutated tumors against sporadic tumors. We included the 2 tumors with somatic BRCA2 inactivation along with those showing germline BRCA2 inactivation. We found that both BRCA1 and BRCA2-mutated tumors had significantly more indels ( $p = 1.63 \times 10^{-5}$  for BRCA1 and  $p = 1.37 \times 10^{-3}$  for BRCA2) and structural variants ( $p = 5.12 \times 10^{-7}$  for BRCA1 and  $p = 0.029$  for BRCA2) per tumor than the sporadic tumors.

We next examined specific types of variation. Both BRCA1 and BRCA2-mutated tumors have more deletions than sporadic tumors (Figure 3a;  $p(\text{BRCA1/2-mutated vs. sporadic}) = 1.96 \times 10^{-7}$ ). While most deletions in sporadic tumors are either  $<5$  bp or  $>10$  kb long, BRCA1/2-mutated tumors have a large



number of deletions of intermediate size; the size distribution of these deletions is bimodal, with one peak between 5-100 bp and the other between 100 bp-10 kb (Figure 3b). While the 5-100 bp long deletions mostly lack microhomology at the breakpoints, the majority of the BRCA1/2-mutated samples have short regions of microhomology (1-10 bp) at the breakpoints in >50% of the deletions in the 100 bp-10 kb size range (Figure 3c).

On the other hand, we confirmed previous studies<sup>11,25</sup> showing that BRCA1-mutated tumors have an elevated number of tandem duplications (Figure 3a;  $p(\text{BRCA1 vs. others}) = 5.93 \times 10^{-7}$ ), predominantly ranging in size from 1-100 kb (Figure 3b). Most of the tandem duplications in this size range have short regions of microhomology at the breakpoints (Figure 3c).

In addition, we observed that the BRCA1-mutated tumors have more interchromosomal translocations than the BRCA2-mutated or sporadic tumors (Figure 3a;  $p(\text{BRCA1-mutated vs. others}) = 4.2 \times 10^{-4}$ ). To our knowledge this phenomenon has not been described previously. Like the tandem duplications described above, these translocations also tend to have microhomology of 1-10 bp at the breakpoints (Figure 3c).

Large copy number alterations in the genome can significantly change genome size. To test whether the elevated numbers of point mutations and structural variants in BRCA1/2-mutated samples are due to biological differences or are accounted for by the availability of more DNA, we identified copy number variants in the genomes of these 81 tumor samples using Control-FREEC<sup>25</sup>. After correcting the size of the genome in each tumor to account for copy number alterations, we find that the BRCA1-mutated samples have larger genomes than BRCA2-mutated or sporadic tumors (Supplementary Figure 3). However, normalizing the number of mutations for the actual size of the genome does not affect our results. BRCA1 and BRCA2-mutated tumors still have significantly higher numbers of point mutations and deletions than sporadic tumors, and BRCA1-mutated tumors have significantly higher numbers of tandem duplications and interchromosomal translocations than all other classes of tumors.

**Functional regions hit by breakpoints in BRCA-mutated tumors.** Since BRCA1/2-mutated tumors have an elevated number of structural variants, we tested whether these structural variants tend to disrupt functional and regulatory regions of the genome. We found that in BRCA1/2-mutated tumors, the breakpoints for interchromosomal translocations, 1-100 kb duplications and 100 bp-10 kb deletions are all more likely to occur in open chromatin ( $p = 3.93 \times 10^{-6}$ ,  $p = 6.56 \times 10^{-6}$  and  $p = 0.034$  respectively). The breakpoints for 1-100 kb tandem duplications and interchromosomal translocations, both of which are elevated in BRCA1-mutated tumors, are also enriched in protein-coding genes ( $p = 1.73 \times 10^{-14}$  and  $p = 0.014$  respectively); the tandem duplication breakpoints are also specifically enriched in exons ( $p = 1.2 \times 10^{-3}$ ). We also found that interchromosomal translocation breakpoints are enriched in TAD boundaries ( $p = 2.92 \times 10^{-4}$ ). Disruption of TAD boundaries has previously been shown to alter gene expression in tumors by modifying 3D contact domains on the chromosome<sup>27</sup>.

We also tested whether the indels and structural variant breakpoints in BRCA1/2-mutated tumors are associated with the local replication timing. The breakpoints for 5-100 bp long deletions ( $p = 4.33 \times 10^{-4}$ ), and for small (<5 bp) indels ( $p = 9.62 \times 10^{-16}$ ) are both enriched in late replicating regions. On the other hand, the breakpoints for 1-100 kb tandem duplications and interchromosomal translocations, both of which are elevated in BRCA1-mutated tumors, are enriched in early replicating regions ( $p = 4.58 \times 10^{-19}$  and  $p = 3.17 \times 10^{-11}$  respectively).

**Structural variants disrupt tumor suppressor genes.** We examined the genes that are disrupted by indel and structural variation breakpoints in BRCA1/2-mutated tumors. The genes disrupted by both indels and SVs have significantly ( $p < 10^{-15}$  for both) higher levels of expression in normal breast tissue, according to RNA-Seq data from GTEx<sup>28</sup> (Supplementary Figure 4). Further, the set of genes disrupted by indels and structural variation are both significantly enriched for tumor suppressor genes ( $p = 1.39 \times 10^{-5}$  and  $p = 4.89 \times 10^{-10}$  respectively).

We next searched for specific genes enriched for indels or structural variant breakpoints in the BRCA1/2-mutated tumors, using a poisson test. The null model here is that breakpoints are randomly distributed throughout the genome, and we identify protein-coding genes that have significantly more breakpoints than expected from their size. We identified 11 genes enriched for indels/structural variant breakpoints: NME7, KLHL8, EFNA5, PTEN, DHX32, ETV6, RB1, ARGLU1, TP53, P4HB, and RUNX1 (Table 1). After correcting the length of each gene to take into account its copy number in each tumor, 10 of these genes (KLHL8, EFNA5, PTEN, DHX32, ETV6, RB1, ARGLU1, TP53, P4HB, RUNX1) remained significant. 4 of them (PTEN, RB1, TP53 and RUNX1) are known tumor suppressors and have also been identified as potential point mutation driver genes<sup>22</sup>, showing that structural variants in BRCA1/2-mutated tumors hit some of the same drivers that are normally damaged by point mutations in sporadic tumors. However, the remaining 6 genes are not known to be enriched for point mutations in breast cancer, and may therefore represent specific indel/structural variant drivers; of these, ETV6 is known to act as a tumor suppressor in leukemias<sup>29</sup>. Moreover, 4 of these genes (RB1, PTEN, KLHL8, and EFNA5) are also spanned by long deletions in multiple BRCA1/2-mutated samples, representing another mode of inactivation.

**Structural variant breakpoints are distributed non-uniformly across the genome.** In our set of 46 BRCA1/2-mutated tumor samples, only about 39% of the breakpoints disrupt known genes. While this fraction is significantly higher than expected by chance, we also wanted to test whether there are larger regions of the genome, including non-coding regions, that are enriched for breakpoints. These would include breakpoints for variants that span across whole genes, as well as those that affect gene expression by disrupting regulatory regions of the genome.

We divided the genome into 10-Mb long bins, overlapping by 5 Mb. We then combined all the high-confidence indels and structural variants collected from all the BRCA1/2-mutated tumors. We tested whether these tumors are enriched for indel/structural variant breakpoints in each bin using a poisson test,

with the null model being that breakpoints are distributed uniformly across the genome. We found 48 bins that had a Bonferroni-corrected p-value of less than 0.05 (Figure 3d). All of these regions were disrupted by at least one indel or structural variant in at least 50% of BRCA1/2-mutated tumors. After correcting the number of bases in each bin to account for copy number changes, 28 bins remained significantly enriched (Bonferroni-corrected  $p < 0.05$ ). These bins are located on chromosomes 3, 5, 6, 8, 10, 11, 12, and 18, and several of them overlap with each other. Their coordinates are listed in Supplementary Table 5.

**Validation of interchromosomal translocations using 10X genomics.** Our analysis above, as well as previous studies<sup>11,24</sup>, highlight the importance of structural variation in the evolution of BRCA-mutated cancers. However, short-read sequencing is not ideal for accurate detection of large structural variants due to the limited read length. 10X Genomics is a linked-read technology, which uses barcodes to identify short fragments that originate from the same large molecules. Thus it provides long-range information based on short-read sequencing offering improved resolution and detection of structural variants<sup>30</sup>. To validate our findings on structural variants, we sequenced additional DNA from 3 tumors with BRCA1 germline mutations using 10X Genomics sequencing. In addition, we sequenced genomic DNA from 1 BRCA2-mutated tumor and 12 sporadic triple-negative tumors from the same study<sup>22</sup>. We used GROCSV<sup>30</sup> to identify structural variants in these genomes.

We reported above a novel finding that BRCA1 mutated tumors have unusually high numbers of interchromosomal translocations. We were able to confirm several of these translocations using 10X sequencing in the 3 BRCA1-mutated samples, providing independent validation of our findings. Further, although the sample size is too small for a statistical test, we observed that these BRCA1-mutated samples had more translocations on average than the sporadic tumors (Supplementary Table 6).

Although structural variants are normally classified into simple categories (such as duplications, deletions, and translocations), recent studies have revealed that some tumor genomes also contain a large number of complex structural variants (CSVs) that cannot be explained by a simple end-joining or

recombination event<sup>31</sup>. In our short-read data, we observe that 16% of structural variants are accompanied by a short insertion at the breakpoint; the occurrence of such insertions is not significantly different in BRCA1/2-mutated tumors. However, larger CSVs composed of multiple rearrangements cannot be detected by short reads. The use of 10X read clouds and GROC-SVs allows us to resolve larger complex events, since the read clouds span multiple breakpoints.

Using GROC-SVs, we detected two complex structural variants in the sample T65 which has a germline BRCA1 mutation: a complex rearrangement on chromosome 11 (Supplementary Figure 5a) and a rearrangement involving a translocation between chromosomes 1 and 2 (Supplementary Figure 5b). The mechanisms that give rise to such complex variants are still uncertain, but our observations suggest that these may play a role in the evolution of BRCA-mutated tumors. Further studies are required to ascertain whether BRCA-mutated tumors differ from sporadic breast tumors in the number and type of complex structural variants, as has been characterized for simple structural variants.

## Discussion

Tumors carrying mutations in the BRCA1 and BRCA2 genes, particularly in BRCA1, have more point mutations than sporadic breast tumors, which is not explained by their larger genome size owing to copy number alterations. If the increased number of mutations in BRCA samples was a function of more cell divisions, we would expect this to be explained by higher exposure to the background signature. We do see higher exposure to the background signature in these tumors, indicating that they have passed through more cell divisions. However, we also see more mutations attributed to other mutagenic processes, particularly Signature 5 (APOBEC dysregulation leading to C>G mutations) and Signature 8, whose etiology is unknown. This indicates that more cell division may not be the only factor contributing to the

higher mutational burden of BRCA1/2-mutated tumors, and that other mutagenic processes are also elevated.

Although BRCA1/2-mutated tumors have a higher exposure to the background signature, they do not have a higher exposure to Signature 6, which represents deamination of methylated cytosines at CpG sites. Under conditions of constant DNA methylation, we would expect the exposure values for these two signatures to be proportional to each other. The disproportionately low contribution of Signature 6 to BRCA1/2-mutated tumors suggests a global reduction in methylation levels, which is confirmed by an analysis of TCGA data for BRCA1 tumors. If true, the reduced methylation could cause dysregulation of gene expression and altered binding of gene regulatory proteins. An altered methylation state is also indicative of dedifferentiation of a tumor, and may be linked to the fact that these tumors have undergone more cell divisions.

It is notable that BRCA1/2-mutated tumors do not appear to possess any unique mutational signatures, suggesting an absence of unique point mutational processes that arise from the BRCA gene mutations. (Even Signature 8, which is elevated in BRCA1/2-mutated tumors, has a high contribution to triple-negative tumors in general.) Instead, BRCA1 and BRCA2 mutated tumors display a clearly distinct profile of structural variants. We confirm previous findings<sup>11,25</sup> related to tandem duplications and deletions, and also find that BRCA1 mutations are associated with an increased number of interchromosomal translocations, which to our knowledge has not been shown before.

The functional relevance of structural variants in BRCA1/2 mutated tumors is shown by their enrichment in protein-coding genes, particularly genes with high expression in breast tissue. We identified 11 genes that are enriched for indels and structural variant breakpoints in BRCA1/2-mutated tumors; these include well-known tumor suppressors such as TP53 and RB1, showing that in BRCA1/2-mutated tumors, structural variants may carry out the same roles that are more likely to be fulfilled by point mutations in sporadic tumors. We also find additional genes which are candidates for indel/SV-specific

driver genes in BRCA1/2 mutated tumors; these frequently damaged genes may have links to the specific biology of tumors with BRCA mutations.

## Conclusions

Overall, our study suggests that BRCA1/2-mutated tumors are comparatively more aggressive than sporadic breast cancers because loss of the BRCA pathway(s) causes a perfect storm of mutagenic processes and gene dysregulation: Less DNA methylation is consistent with the propensity to deregulate and dedifferentiate, and the resulting larger numbers of cell divisions cause a greater point mutational burden; other point-mutagenic processes that may be linked to the tissue of origin and occur in sporadic breast tumors are also active (e.g., APOBEC dysregulation); and crucially, loss of double-strand break repair elevates structural variation rates such that there is a greater chance that driver genes that are hard to functionally affect with point mutations are disrupted at a higher rate than in sporadic tumors.

## Methods

**Preprocessing data for mutational signature extraction.** Point mutations occurring in a genome can be divided into 96 categories based on the base being mutated, the base it is mutated into and its two flanking bases. We therefore represent the dataset of 560 patients from Nik-Zainal et al.<sup>11</sup> as a mutation count matrix  $M$  of size  $560 \times 96$ , where element  $M_{ij}$  is the number of mutations belonging to category  $j$  in patient  $i$ . As discussed in SparseSignatures<sup>20</sup>, we removed 5 patients with less than 1000 total mutations, giving a final matrix  $M$  of size  $555 \times 96$ .

**Modeling mutational signatures.** A mutational signature can be represented by a vector  $s$  of length 96;  $s = [s_1 \dots s_{96}]$  where each element  $s_j$  represents the probability that this mutagenic process generates a mutation of category  $j$ . Since these are probabilities, they sum to 1.

Alexandrov et al.<sup>17</sup> proposed to represent the mutation count matrix  $M$  as follows:

$$M \approx \alpha \beta,$$

where  $\alpha_{n \times K}$  is the exposure matrix (giving the number of mutations contributed by each signature to each patient).  $\alpha_{ij}$  is the exposure for the  $j^{th}$  signature in the  $i^{th}$  patient.  $\beta_{K \times J}$  is the signature matrix, where each row represents a signature.  $\beta_{ij}$  is the proportion of mutations in the  $i^{th}$  signature that fall into the  $j^{th}$  category.

SparseSignatures<sup>19</sup> incorporates a null model based on mutation rates in the germline. This is the pattern of mutations that would be expected in the course of normal cell division, and is denoted by a vector  $\beta_0$  of length  $J$ , leading to the following representation:

$$M \approx \alpha_0 \beta_0 + \alpha \beta,$$

where  $\alpha_0$  is a vector of exposures, representing the number of mutations contributed by the null ('background') signature to each patient.

SparseSignatures also includes two other conceptual improvements: (1) a sparsity constraint based on the LASSO on the matrix  $\beta$  in order to reduce noise and enhance sparsity and separation of the discovered signatures; and (2) a bi-cross-validation approach to choose the number of signatures and avoid overfitting. For details we refer to the paper describing SparseSignatures<sup>20</sup>.

**Implementation of SparseSignatures.** In our analysis, we repeated the bi-cross-validation procedure 300 times and we considered values of  $K$  ranging from 3 to 10 and  $\lambda$  ranging from 0.05 to 0.15. In cross-validation, the configuration with 8 signatures in addition to the background, and  $\lambda=0.15$ , gave the



lowest mean squared error on held-out data points. We used the Bioconductor implementation of SparseSignatures (version 1.0.2) in R version 3.3.3.

**Short Read Sequencing.** Total genomic DNA was extracted from 14 BRCA+ tumor samples from 13 patients (DNA was extracted from both breasts for one patient) using AllPrep DNA/RNA Mini Kit (Qiagen, Cat. No 80204). The matched control DNA was also isolated from blood of the same patients using Gentra Puregene Blood Kit (Qiagen, Cat. No 158467). To generate short-fragment DNA libraries, 1 ug of total genomic DNA for each sample was sheared to 350 bp. The PCR-free libraries were then constructed from the sheared DNA using Illumina's TruSeq DNA PCR-Free Sample Preparation Kit. Each library was sequenced with one lane of 2x150bp Illumina HiSeqX sequencing run to 40x genomic coverage.

**10X Genomics Sequencing.** We selected 6 BRCA1/2-mutated tumor samples and 12 sporadic triple-negative tumor samples<sup>23</sup> for 10X genomic sequencing. The long genomic DNA was isolated from 5-10mg tumor core using Gentra Puregene Tissue Kit following the manufacturer's instructions (Qiagen, Cat. No 158667). Briefly, the small tumor tissue was ground in liquid nitrogen, lysed in Cell Lysis Solution and Proteinase K, and RNA was digested with RNase A. Protein was pelleted and removed by the addition of Protein Precipitation Solution followed by centrifugation. Genomic DNA was precipitated with isopropanol and resuspended in buffer EB. 1.2ng DNA molecules of long fragment were partitioned and barcoded using 10X Genomics Chromium. Each partition had a unique barcode. The barcoded DNA fragments were produced in parallel through emulsion isothermal amplification such that all fragments generated within a partition shared the same barcode. The resulting DNA fragments (Post GEM DNA) from all partitions of the same sample were pooled and recovered. Libraries were constructed following the manufacturer's protocol through End Repairing, A-tailing, Adaptor Ligation and PCR Amplification. Each library was then sequenced on one lane with a paired-end 150bp run using the Illumina HiSeqX platform to obtain 30x genomic coverage.

**Sequencing data analysis.** BWA<sup>32</sup> v0.7.12 was used to align short-read sequencing data to the human genome. Longranger<sup>33</sup> v1.3 was used to align 10X genomics data.

**Structural variant calling.** BAM files were generated as described above, and for the publicly available data, we downloaded BAM files from the ICGC data portal (<https://dcc.icgc.org>). We ran SvABA on all BAM files using the default parameters<sup>17</sup>.

Variants with length  $\geq 50$  bp, as well as interchromosomal translocations, were defined as Structural Variants (SVs) while smaller variants were defined as indels. High-confidence SVs and indels were obtained by selecting variants with (1) both breakpoints in chromosomes 1-22 or X (2) 0 supporting reads in the matched normal sample (3)  $\geq 10$  supporting reads in the tumor sample, at least 2 of which are split reads in the case of SVs (4) QUAL  $\geq 30$  and MAPQ of supporting reads  $\geq 30$  (5) neither breakpoint in a gap region (6) Both junctions assembled. We also removed variants that were found in more than one tumor sample or unmatched normal sample, as well as variants found in DGV<sup>34</sup>.

For structural variant detection from 10X genomics prepared samples we used GROC-SVs<sup>30</sup> with default settings.

**Copy number calling.** We used Control-FREEC<sup>26</sup> to call genome-wide copy number for the samples in our cohort. We used the default parameters for the tool.

**Statistical tests.** Numbers of point mutations and structural variants in various groups of samples were compared using the Wilcoxon test. Enrichment of breakpoints in functional regions of the genome was tested using a poisson test, with the null model being that breakpoints are distributed uniformly across the genome (excluding gap regions). To calculate enrichment of indels/SV breakpoints in 10-Mb genomic bins, all the indels and SVs discovered in 46 BRCA-deficient samples were combined and the density of breakpoints across the genome (excluding gap regions) was calculated as  $7.36 \times 10^{-6}$ /bp. The genome was divided into 574 10-Mb bins overlapping by 5 Mb each. Bins with  $>25\%$  overlap with gap regions were

removed, leaving 516 bins. For each bin, a p-value for enrichment of breakpoints was calculated using a poisson test and bins with a Bonferroni-corrected p-value less than 0.05 were selected. The same procedure was carried out using gene bodies instead of genomic bins to identify genes enriched for breakpoints.

**External data.** The hg19 human genome was used for all analyses. Positions of genes, exons, open chromatin regions and gap regions were obtained from the UCSC genome browser. Positions of TAD boundaries in MCF-10a cell lines were obtained from Barutcu et al.<sup>35</sup>. Lists of oncogenes and tumor suppressor genes were obtained from the Cancer Gene Census (<https://cancer.sanger.ac.uk/census>).

Data on replication timing was obtained from Carithers et al.<sup>36</sup>. Genomic regions were divided into early-replicating, mid-replicating and late-replicating categories such that a third of the genome for which data was provided was included in each category.

Expression levels in normal human breast tissue was obtained from GTex<sup>28</sup>.

## **Declarations**

### **Ethics approval and consent to participate**

Genomic DNA from 14 BRCA1/2-mutated tumors and their matched normal samples was sequenced in this study, as well as genomic DNA from 12 sporadic tumor samples. These samples were obtained as detailed in Telli et al.<sup>23</sup> This protocol was approved by the institutional review board at Stanford University. Informed consent was obtained from all patients.

### **Consent for publication**

Not Applicable.

## **Availability of data and material**

The data generated during the current study is available on dbGAP under the accession number X.

Sequencing data from Nik-Zainal et al.<sup>11</sup> are available from ICGC (<https://icgc.org>). VCF files and methylation data from TCGA were downloaded from the NCI Genomic Data Commons Legacy Archive (<https://portal.gdc.cancer.gov/legacy-archive>). GTEx expression data are available from the GTEx Portal (<https://www.gtexportal.org/home/datasets>). The data used here were based on GTEx analysis v7.

## **Competing interests**

All authors declare that they have no competing interests.

## **Funding**

This work was supported by an R01 grant to A.S. (NIH/NCI) and a gift from the BRCA Foundation. A.L. is supported by a Young Investigator Award from the BRCA Foundation.

## **Authors' contributions**

AS, JMF, AL and DR designed the study. AL and DR analyzed and interpreted sequencing data. ZW carried out short-read and 10X sequencing of tumor samples. KL helped with mutational signature discovery. AL, DR, and AS wrote the manuscript with assistance from JMF. All authors read and approved the final manuscript.

## **Acknowledgements**

We thank Drs. Noah Spies, Alan Ashworth, David Livingston, and Joan Brugge for discussions. The results published here are based in part upon data generated by the TCGA Research Network (<http://cancergenome.nih.gov/>) and the Genotype-Tissue Expression (GTEx) Project. The GTEx project

was supported by the Common Fund of the Office of the Director of the National Institutes of Health, and by NCI, NHGRI, NHLBI, NIDA, NIMH, and NINDS.

## References

1. Prakash, Rohit, et al. "Homologous recombination and human health: the roles of BRCA1, BRCA2, and associated proteins." *Cold Spring Harbor perspectives in biology* 7.4 (2015): a016600.
2. Antoniou, Anthony, et al. "Average risks of breast and ovarian cancer associated with BRCA1 or BRCA2 mutations detected in case series unselected for family history: a combined analysis of 22 studies." *The American Journal of Human Genetics* 72.5 (2003): 1117-1130.
3. Malone, Kathleen E., et al. "Prevalence and predictors of BRCA1 and BRCA2 mutations in a population-based study of breast cancer in white and black American women ages 35 to 64 years." *Cancer research* 66.16 (2006): 8297-8308.
4. Kuchenbaecker, Karoline B., et al. "Risks of breast, ovarian, and contralateral breast cancer for BRCA1 and BRCA2 mutation carriers." *Jama* 317.23 (2017): 2402-2416.
5. Couch, Fergus J., Katherine L. Nathanson, and Kenneth Offit. "Two decades after BRCA: setting paradigms in personalized cancer care and prevention." *Science* 343.6178 (2014): 1466-1470.
6. King, Mary-Claire. "'The race' to clone BRCA1." *Science*, 343.6178 (2014): 1462-1465.
7. Ceccaldi, Raphael, Beatrice Rondinelli, and Alan D. D'Andrea. "Repair pathway choices and consequences at the double-strand break." *Trends in cell biology* 26.1 (2016): 52-64.

8. Wang, Hua, et al. "BRCA1/FANCD2/BRG1-Driven DNA repair stabilizes the differentiation state of human mammary epithelial cells." *Molecular cell* 63.2 (2016): 277-292.
9. Vogelstein, Bert, et al. "Cancer genome landscapes." *science* 339.6127 (2013): 1546-1558.
10. Greenup, Rachel, et al. "Prevalence of BRCA mutations among women with triple-negative breast cancer (TNBC) in a genetic counseling cohort." *Annals of surgical oncology* 20.10 (2013): 3254-3258.
11. Nik-Zainal, Serena, et al. "Landscape of somatic mutations in 560 breast cancer whole-genome sequences." *Nature* 534.7605 (2016): 47-54.
12. Stefansson, Olafur Andri, et al. "Genomic profiling of breast tumours in relation to BRCA abnormalities and phenotypes." *Breast Cancer Research* 11.4 (2009): R47.
13. Van't Veer, Laura J., et al. "Gene expression profiling predicts clinical outcome of breast cancer." *nature* 415.6871 (2002): 530.
14. Berchuck, Andrew, et al. "Frequency of germline and somatic BRCA1 mutations in ovarian cancer." *Clinical Cancer Research* 4.10 (1998): 2433-2437.
15. Khoo, Ui-Soon, et al. "Somatic mutations in the BRCA1 gene in Chinese sporadic breast and ovarian cancer." *Oncogene* 18.32 (1999): 4643.
16. Davies, Helen, et al. "HRDetect is a predictor of BRCA1 and BRCA2 deficiency based on mutational signatures." *Nature medicine* 23.4 (2017): 517.
17. Alexandrov, Ludmil B., et al. "Deciphering signatures of mutational processes operative in human cancer." *Cell reports* 3.1 (2013): 246-259.

18. Alexandrov, Ludmil, et al. "The Repertoire of Mutational Signatures in Human Cancer." *bioRxiv* (2018): 322859.
19. Alexandrov, Ludmil B., et al. "Signatures of mutational processes in human cancer." *Nature* 500.7463 (2013): 415-421.
20. Ramazzotti, D., et al. "De Novo Mutational Signature Discovery in Tumor Genomes using SparseSignatures." (2018).
21. Meier, Bettina, et al. "Mutational signatures of DNA mismatch repair deficiency in *C. elegans* and human cancers." *Genome research* 28.5 (2018): 666-675.
22. Ciriello, Giovanni, et al. "Comprehensive molecular portraits of invasive lobular breast cancer." *Cell* 163.2 (2015): 506-519.
23. Telli, Melinda L., et al. "Phase II study of gemcitabine, carboplatin, and iniparib as neoadjuvant therapy for triple-negative and BRCA1/2 mutation-associated breast cancer with assessment of a tumor-based measure of genomic instability: PrECOG 0105." *Journal of Clinical Oncology* 33.17 (2015): 1895.
24. Wala, Jeremiah A., et al. "SvABA: genome-wide detection of structural variants and indels by local assembly." *Genome research* 28.4 (2018): 581-591.
25. Menghi, Francesca, et al. "The tandem duplicator phenotype as a distinct genomic configuration in cancer." *Proceedings of the National Academy of Sciences* 113.17 (2016): E2373-E2382.
26. Boeva, Valentina, et al. "Control-FREEC: a tool for assessing copy number and allelic content using next-generation sequencing data." *Bioinformatics* 28.3 (2011): 423-425.

27. Weischenfeldt, Joachim, et al. "Pan-cancer analysis of somatic copy-number alterations implicates IRS4 and IGF2 in enhancer hijacking." *Nature genetics* 49.1 (2017): 65.
28. Lonsdale, John, et al. "The genotype-tissue expression (GTEx) project." *Nature genetics* 45.6 (2013): 580.
29. MLA Van Vlierberghe, Pieter, et al. "ETV6 Is An Early T-Cell Progenitor (ETP) Specific Tumor Suppressor Gene in Adult T-ALL." (2011): 406-406.
30. Spies, Noah, et al. "Genome-wide reconstruction of complex structural variants using read clouds." *nature methods* 14.9 (2017): 915.
31. Quinlan, Aaron R., and Ira M. Hall. "Characterizing complex structural variation in germline and somatic genomes." *Trends in Genetics* 28.1 (2012): 43-53.
32. Li, Heng, and Richard Durbin. "Fast and accurate short read alignment with Burrows–Wheeler transform." *bioinformatics* 25.14 (2009): 1754-1760.
33. Long Ranger. (2016). 10 Genomics.
34. MacDonald, Jeffrey R., et al. "The Database of Genomic Variants: a curated collection of structural variation in the human genome." *Nucleic acids research* 42.D1 (2013): D986-D992.
35. Barutcu, A. Rasim, et al. "Chromatin interaction analysis reveals changes in small chromosome and telomere clustering between epithelial and breast cancer cells." *Genome biology* 16.1 (2015): 214.
36. Carithers, Latarsha J., et al. "A novel approach to high-quality postmortem tissue procurement: the GTEx project." *Biopreservation and biobanking* 13.5 (2015): 311-319.



**Table 1**

|    | Gene   | Chromosome | Length (bp) | Number of indels/SV breakpoints | p-value                | Adjusted p-value      | Adjusted p-value (corrected for copy number) |
|----|--------|------------|-------------|---------------------------------|------------------------|-----------------------|----------------------------------------------|
| 1  | RB1    | 13         | 176159      | 17                              | $6.83 \times 10^{-14}$ | $1.31 \times 10^{-9}$ | <b><math>1.69 \times 10^{-10}</math></b>     |
| 2  | TP53   | 17         | 6986        | 5                               | $2.87 \times 10^{-9}$  | $5.48 \times 10^{-5}$ | <b><math>2.13 \times 10^{-5}</math></b>      |
| 3  | PTEN   | 10         | 101523      | 10                              | $7.58 \times 10^{-9}$  | $1.45 \times 10^{-4}$ | <b><math>7.53 \times 10^{-5}</math></b>      |
| 4  | ETV6   | 12         | 240919      | 13                              | $5.33 \times 10^{-8}$  | 0.00102               | <b>0.00243</b>                               |
| 5  | RUNX1  | 21         | 256765      | 13                              | $1.10 \times 10^{-7}$  | 0.00210               | <b>0.00275</b>                               |
| 6  | KLHL8  | 4          | 32021       | 6                               | $1.94 \times 10^{-7}$  | 0.00372               | <b>0.00293</b>                               |
| 7  | P4HB   | 17         | 16460       | 5                               | $1.96 \times 10^{-7}$  | 0.00380               | <b>0.00592</b>                               |
| 8  | NME7   | 1          | 234926      | 12                              | $3.04 \times 10^{-7}$  | 0.00581               | 0.0695                                       |
| 9  | EFNA5  | 5          | 289359      | 13                              | $4.16 \times 10^{-7}$  | 0.0080                | <b>0.00193</b>                               |
| 10 | ARGLU1 | 13         | 23924       | 5                               | $1.22 \times 10^{-6}$  | 0.0233                | <b>0.0234</b>                                |
| 11 | DHX32  | 10         | 44138       | 6                               | $1.24 \times 10^{-6}$  | 0.0236                | <b>0.0168</b>                                |

**Table 1:** 11 protein-coding genes show enrichment for indels/structural variant breakpoints in BRCA1/2-mutated tumors.

## Figure Legends

**Figure 1.** Boxplots showing the number of single nucleotide variants in the whole genomes of different classes of breast tumors, based on data from 560 breast tumors<sup>11</sup>. TN = Triple-negative.

**Figure 2.** a) 9 signatures (including background) discovered by applying SparseSignatures to the whole genomes of 555 breast tumors. b) Boxplots showing the number of mutations attributed to each signature

in different classes of breast tumors. c) Boxplots showing the fraction of mutations attributed to each signature in each sample, for different classes of breast tumors. d) Average beta-value (representing the extent of cytosine methylation) of CpG sites, in different classes of breast tumors, based on data from TCGA<sup>22</sup>.

**Figure 3.** a) Boxplots showing the number of deletions, tandem duplications, and interchromosomal translocations, in the genomes of 81 breast tumors. b) Probability distributions of the sizes of deletions and tandem duplications in the genomes of 81 breast tumors. c) Boxplots showing the fraction of structural variants in a tumor genome that contain regions of microhomology at the breakpoint, divided into deletions, tandem duplications and interchromosomal translocations, for 46 BRCA1/2-mutated tumors. The x-axis shows size of the structural variants. d) Manhattan plot with the y-axis showing the bonferroni-corrected p-value for enrichment of structural variants in 10-Mb long genomic bins, for 46 BRCA1/2-mutated tumors. The y-axis shows the position of the bin. Chromosomes are ordered from 1 to 22 followed by X.

## Supplementary Material Legends

**Supplementary Figure 1.** Boxplots showing the ratio between exposures to Signature 6 (DNA CpG methylation) and the background signature, in BRCA1/2-mutated tumors and various classes of sporadic breast tumors.

**Supplementary Figure 2.** Boxplots showing the average beta-value (extent of DNA cytosine methylation) across 3081 CpA sites, in BRCA1/2-mutated and sporadic breast tumors, based on data from TCGA.

**Supplementary Figure 3.** Boxplots showing the total number of bases in the genome (accounting for copy number changes) in BRCA1-mutated, BRCA2-mutated, and sporadic breast tumors, for the dataset of 81 selected breast tumors.

**Supplementary Figure 4.** Boxplots showing the level of expression in normal breast tissue for genes disrupted by a) indels and b) SVs in 46 BRCA1/2-mutated tumors, based on RNA-Seq data from GTEx<sup>27</sup>. Expression for each gene was measured as median TPM level across all breast tissue samples in the GTEx dataset.

**Supplementary Figure 5.** Two complex structural variants discovered by 10X Genomics sequencing and GROCAP-SVs in the genome of tumor T65 containing a germline BRCA1 mutation. Inferred extent of breakpoint-supporting read clouds (corresponding to input fragments). The x-axes show chromosomal position. Each row is one read cloud (a cluster of identically barcoded linked reads). The long fragments tile across the breakpoints when ordered by their leftmost position in the left panel.

**Supplementary Table 1.** 9 signatures (including the background) discovered by SparseSignatures on the whole genomes of 560 breast tumors.

**Supplementary Table 2.** Comparison of the 9 signatures (including background) obtained by SparseSignatures with those obtained in a previous study<sup>11</sup>.

**Supplementary Table 3.** Exposure values (number of mutations attributed to each signature) for each of the 9 signatures, in each of the 560 breast tumors.

**Supplementary Table 4.** Details of the 81 samples used for structural variant analysis with SvABA.

**Supplementary Table 5.** Details of 10-Mb genomic bins with significant enrichment of structural variant breakpoints, in the combined genomes of 46 BRCA1/2 mutated tumors.

**Supplementary Table 6.** Validation of interchromosomal translocations in BRCA1-mutated tumors using 10X genomics.

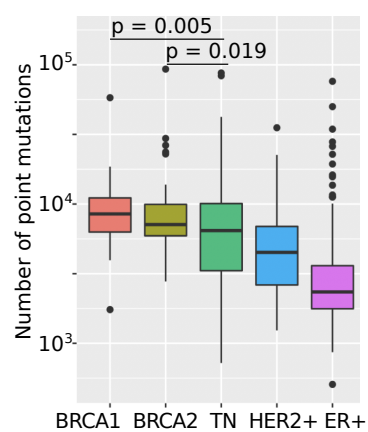

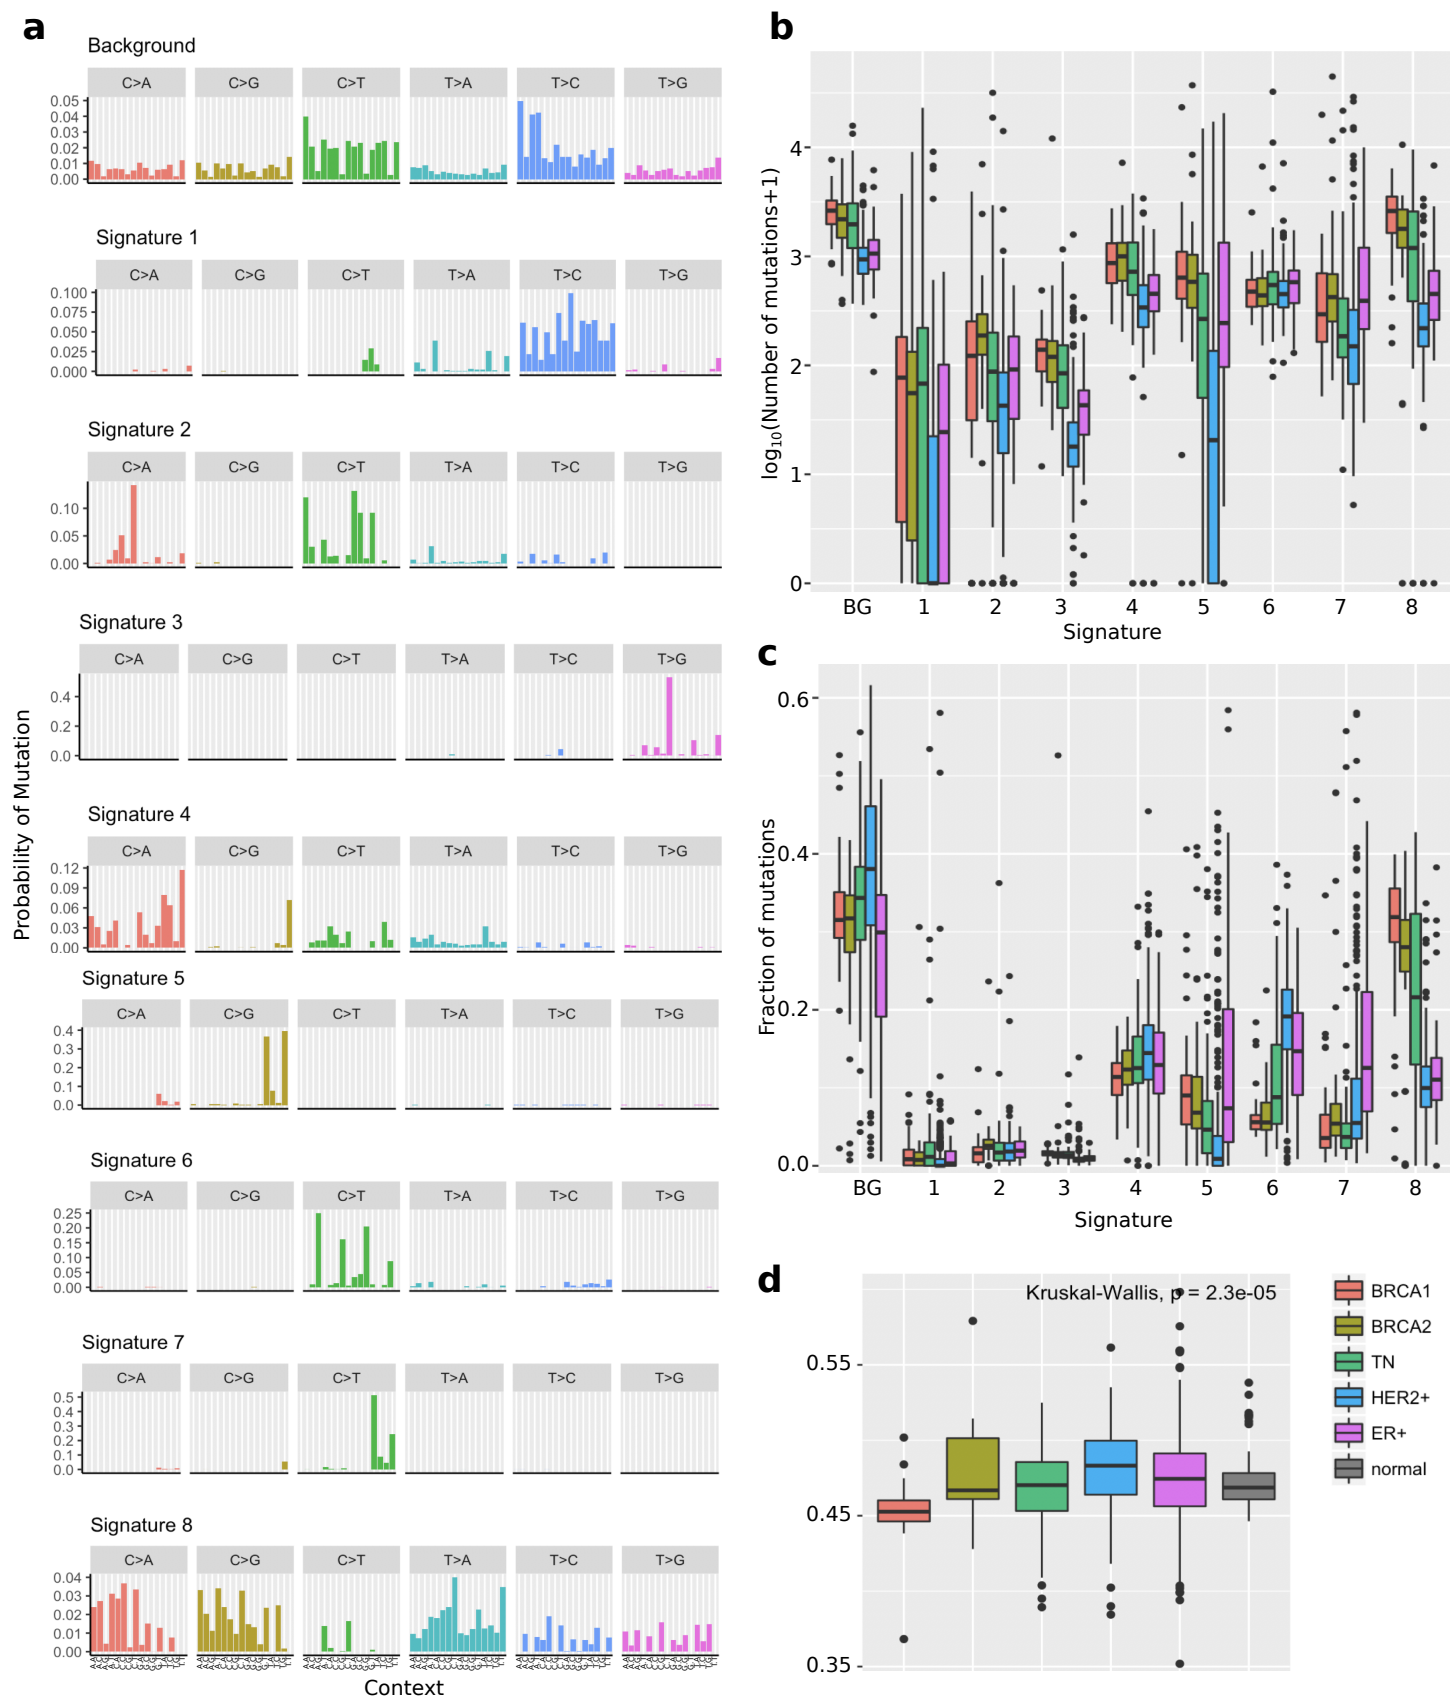

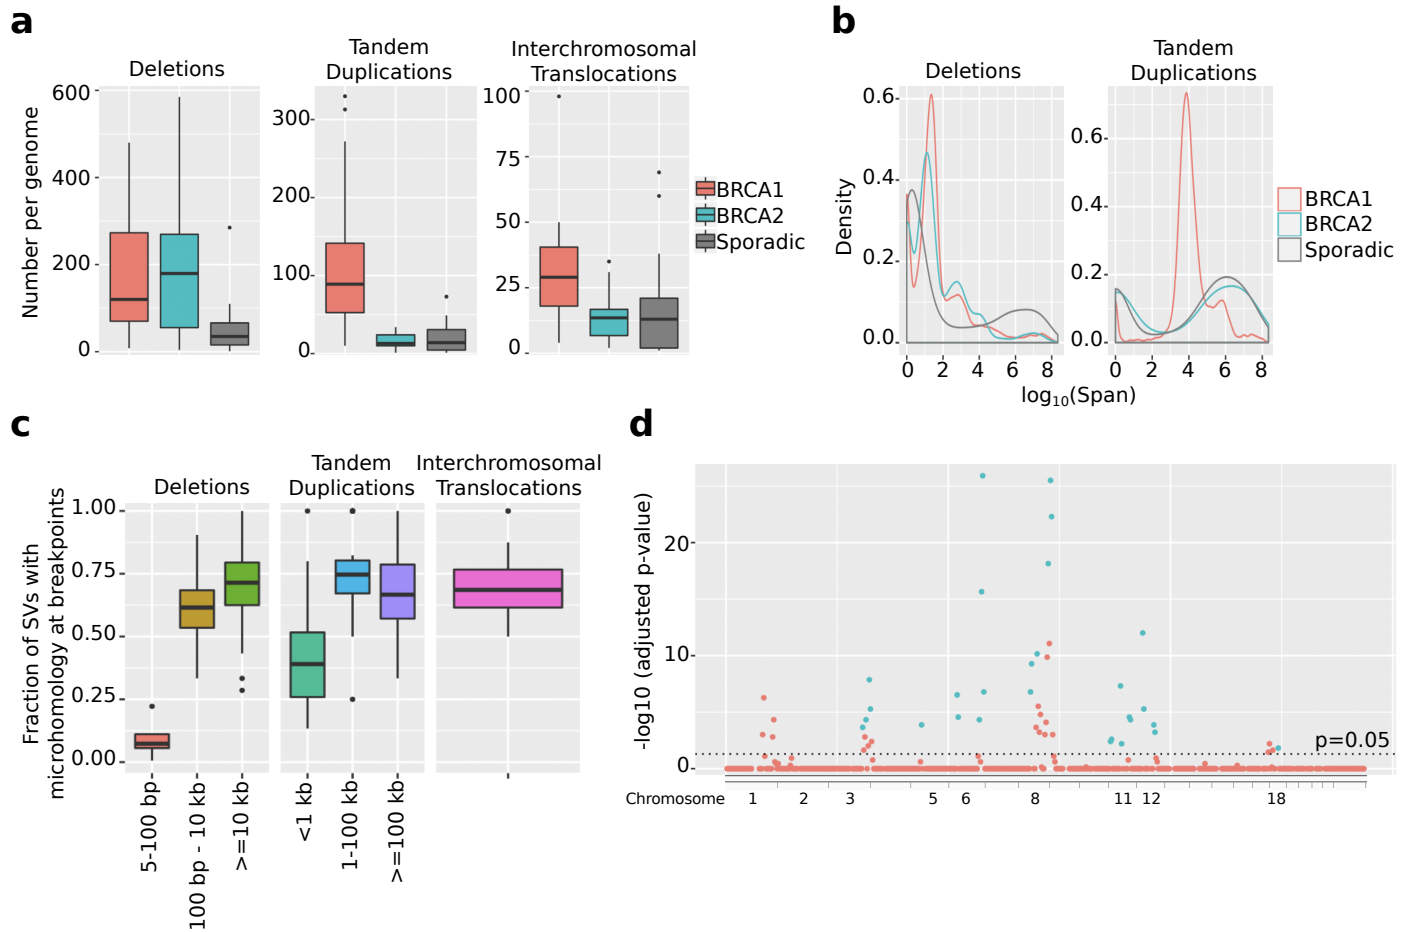

Source: https://www.biorxiv.org/content/10.1101/409813v1.full.pdf
